# Supplementary material for: Full-Length Transcriptome Sequencing and Identification of Hsf Genes in Cunninghamia lanceolata (Lamb.) Hook
Source: MDPI journal article supplement (doi:10.3390/f14040684), 2023-03-27
Supplement: s1 [file s1]

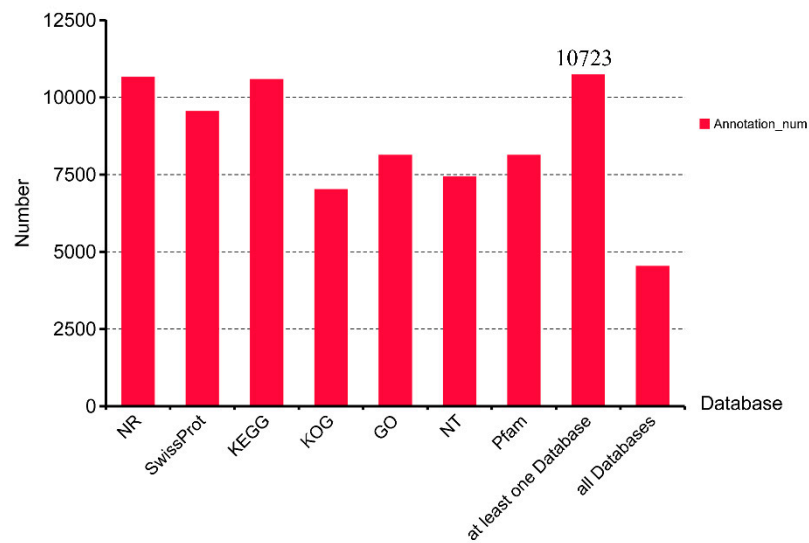

Figure S1. Gene function annotations using different databases.

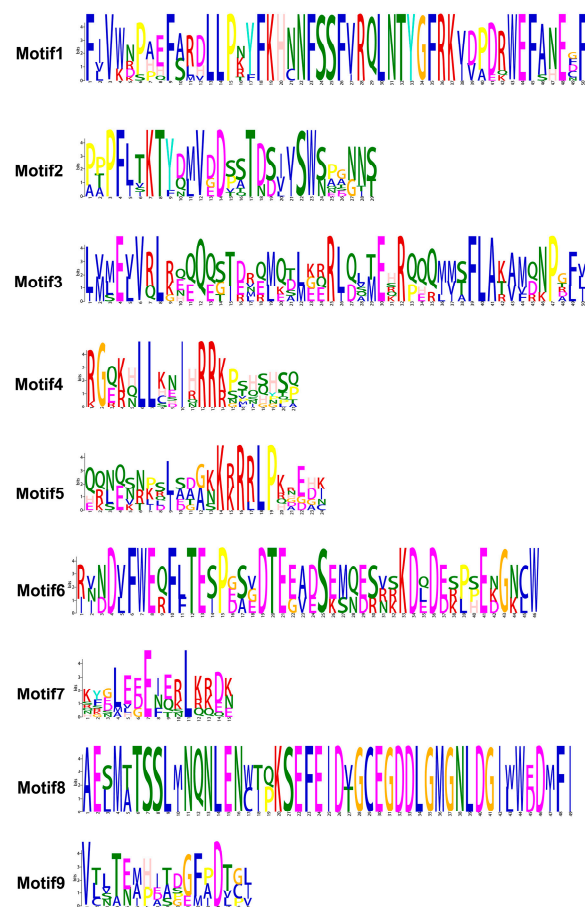

Figure S2. motif structure map of CIHsps gene family.

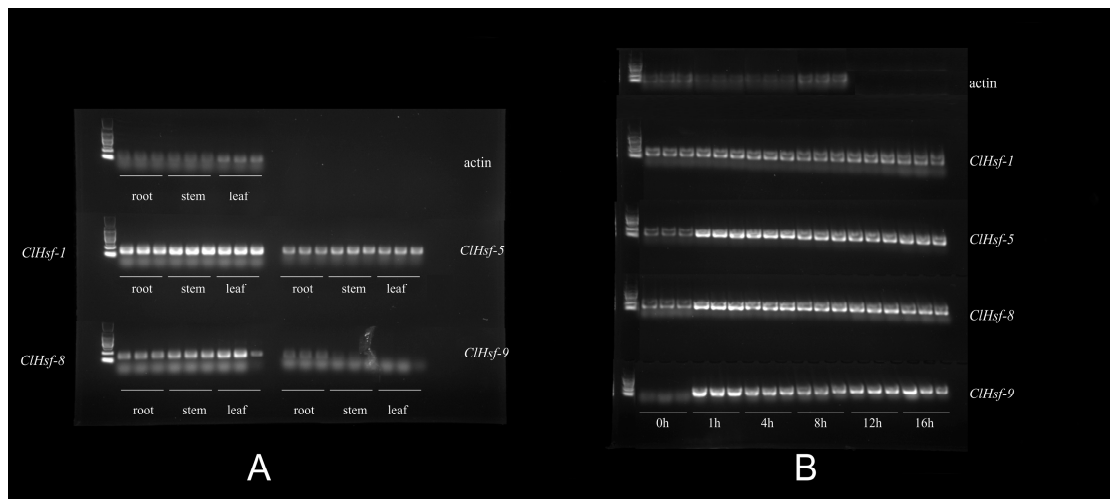

Figure S3. Semi-quantitative PCR of *CIHsf* gene family.

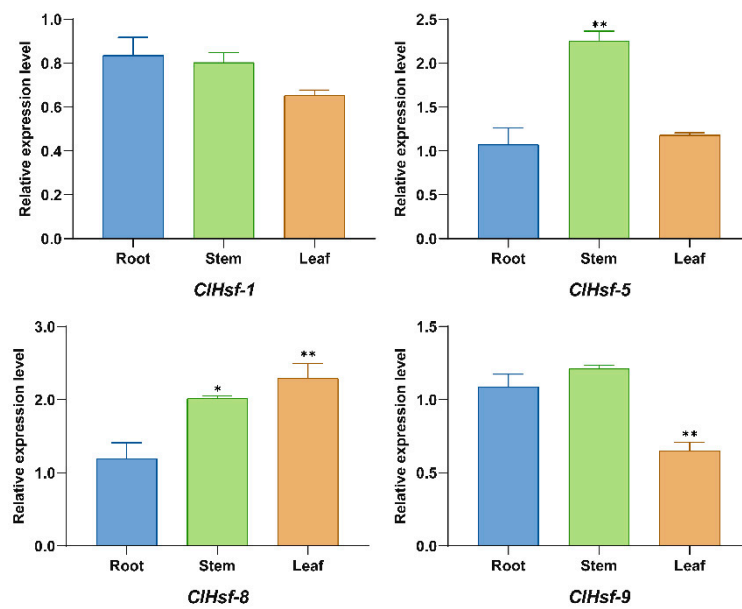

Figure S4. Expression analysis of *CIHsfs* in different tissues. Analysis of variance was used for statistical analysis. \*  $p < 0.05$ , \*\*  $p < 0.01$ , \*\*\*  $p < 0.001$ .
