# Supplementary material for: Full-Length Transcriptome Sequencing and Identification of Hsf Genes in Cunninghamia lanceolata (Lamb.) Hook
Source: MDPI journal article supplement (doi:10.3390/f14040684), 2023-03-27
Supplement: s1 [file s1]

Archive with 2 entries (2 files):
- supplyment Figure.pdf
- supplyment Table.xlsx
