# Supplementary material for: Full-Length Transcriptome Sequencing and Identification of Hsf Genes in Cunninghamia lanceolata (Lamb.) Hook
Source: MDPI journal article supplement (doi:10.3390/f14040684), 2023-03-27
Supplement: s1 [file s1 › supplyment Table.xlsx]

## Sheet: Table S1
Table S1 Gene statistics annotated by different databases
Database	NR	SwissProt	KEGG	KOG	GO	NT	Pfam	at least one Database	all Databases
Annotation_num	10648	9540	10577	7011	8121	7420	8121	10723	4527

## Sheet: Table S3
Table S3 Sequence length distribution statistics table after de-redundancy
Sample	Total_nucleotides	Total_number	Mean_length	Min_length	Max_length	N50	N90
Cunninghamia lanceolata	35284345	11094	3181	459	10329	3572	2000

## Sheet: Table S4
Table S4 Physicochemical properties of CIHsf proteins.
Gene ID	Gene name	Protein size（aa）	PI	Mw (kDa)	Predicting subcellular localization
transcript_HQ_Hh6_transcript13258/f3p0/2655	CIHsf-1	524	5.06	58.78	Nucleus
transcript_HQ_Hh6_transcript14448/f2p0/2466	CIHsf-2	524	4.65	58.17	Nucleus
transcript_HQ_Hh6_transcript16782/f4p0/2130	CIHsf-3	317	5.45	35.77	Nucleus
transcript_HQ_Hh6_transcript16953/f14p0/2075	CIHsf-4	512	5.02	57.45	Nucleus
transcript_HQ_Hh6_transcript17006/f32p0/2050	CIHsf-5	319	5.41	35.98	Nucleus
transcript_HQ_Hh6_transcript17066/f19p0/2052	CIHsf-6	377	6.53	42.3	Nucleus
transcript_HQ_Hh6_transcript19968/f2p0/1594	CIHsf-7	317	7.05	35.8	Nucleus
transcript_HQ_Hh6_transcript17838/f2p0/1968	CIHsf-8	343	4.91	45.22	Nucleus
transcript_HQ_Hh6_transcript18061/f2p0/1910	CIHsf-9	319	6.66	35.16	Nucleus

## Sheet: Table S5
Table S5 primer for qRT-PCR of CIHsf gene family
Primer	Sequence(5'-3')
q-ClHsf-1-1F	GCAAGAAAAGACGACTGCCC
q-ClHsf-1-1R	TGTCTGATGACGCCTCAAGC
q-ClHsf-5-1F	TGGGTTTGCGGATACTGGAC
q-ClHsf-5-1R	CGCAACCCGTATCGATCTCA
q-ClHsf-8-1F	AGAAAAGGCGTAGGCTTCCC
q-ClHsf-8-1R	GAAAGCCTCCAGAGGACTCG
q-ClHsf-9-1F	ATCAGCAGACGCATCGACAT
q-ClHsf-9-1R	ACAGCATGGGACTTCTGCTC

## Sheet: Table S2√
Table S2 Length and frequency distribution statistics table of transcripts before and after de-redundancy
Status	Transcripts length interval	<500bp	500-1kbp	1k-2kbp	2k-3kbp	>3kbp	Total
Before	Number of transcripts	6	107	3659	6718	10841	21331
After	Number of genes	3	78	2103	3461	5449	11094
